# Supplementary material for: Anti-Inflammatory Effects of Clematis terniflora Leaf on Lipopolysaccharide-Induced Acute Lung Injury
Source: Hindawi journal article supplement (doi:10.1155/2024/6653893), 2024-01-09
Supplement: f1 [file 6653893.f1.zip]

## Anti-inflammatory effects of *Clematis terniflora* leaf on lipopolysaccharide-induced acute lung injury

**Supplementary Figure S1.** Effects of EELCT on cell viability.

**A**

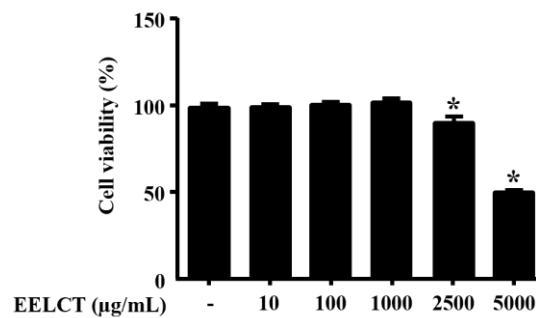

(A) RAW 264.7 cells ( $1 \times 10^5$  cells/well in a 96-well plate) were treated with/without EELCT (10–5,000  $\mu\text{g/mL}$ ) for 24 h and incubated with MTT reagent (1 mg/mL) for 2 h at 37 °C. The formazan crystals were dissolved 100  $\mu\text{L}$  of dimethyl sulfoxide and measured absorbance at 570 nm. Graph data represent the relative absorbance of cells treated with/ without EELCT as mean  $\pm$  SD. \* $p < 0.05$  compared with control cells.

**Supplementary Figure S2.** Effects of EELCT on MPO production in LPS-induced ALI model.

**A**

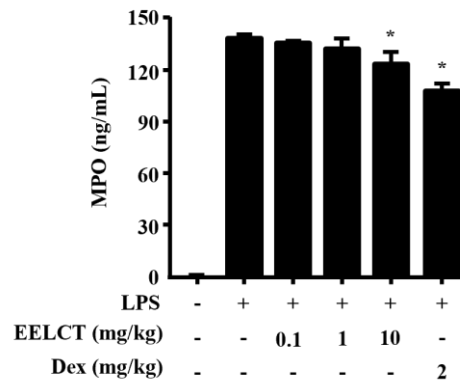

Mice were intratracheally injected with LPS (5 mg/kg) and 24 h later, mice were sacrificed and BALF were collected. (A) MPO levels in BALF was measured by ELISA. Graph data represent the mean  $\pm$  SEM. \* $p < 0.05$  compared with the ALI group. Dex: dexamethasone.

**Supplementary Table S1.** Primers sequences used for qPCR.

Table 1. Primer sequences used for qPCR.

| Primer        | Sequence 5'→3'               | GenBank accession number |
|---------------|------------------------------|--------------------------|
| GAPDH         | F: AGACACCATGGGGAAGGTGA      | NM_008084.3              |
|               | R: TGGAATTTGCCATGGGTGGA      |                          |
| COX-2         | F: GCCAGGCTGAACTTCGAAACA     | NM_011198.5              |
|               | R: GCTCACGAGGCCACTGATACCTA   |                          |
| iNOS          | F: GGAATGGAGACTGTCCCAGCA     | NM_010927.4              |
|               | R: GTCATGAGCAAAGGCGCAGA      |                          |
| TNF- $\alpha$ | F: GGCAGGTCTACTTTGGAGTCATTGC | NM_013693.3              |
|               | R: ACATTCGAGGCTCCAGTGAATTCGG |                          |
| IL-6          | F: TCCAGTTGCCTTCTTGGGAC      | NM_0.1168.2              |
|               | R: GGTCTGTTGGGAGTGGTATC      |                          |
| IL-1 $\beta$  | F: GGACCTTCCAGGATGAGGAC      | NM_008361.4              |
|               | R: GTTCATCTCGGAGCCTGTAG      |                          |

F, forward; R, reverse.

**Supplementary Table S2.** Antibody information used in Western blot.

| Target                                 | Supplier       | Cat. No.  | Size (kDa) | Host   | Dilution |
|----------------------------------------|----------------|-----------|------------|--------|----------|
| $\beta$ -actin                         | Invitrogen     | MA5-15739 | 42         | Mouse  | 1:1000   |
| COX-2                                  | Santa Cruz     | 4842S     | 74         | Rabbit | 1:1000   |
| iNOS                                   | Cell Signaling | sc-651    | 130        | Rabbit | 1:1000   |
| NF- $\kappa$ B p65                     | Cell Signaling | 8242S     | 65         | Rabbit | 1:1000   |
| p-NF- $\kappa$ B p65 <sup>Ser536</sup> | Cell Signaling | 3033S     | 65         | Rabbit | 1:1000   |
| ERK                                    | Cell Signaling | 9102S     | 42, 44     | Rabbit | 1:1000   |
| p-ERK <sup>Thr202/Tyr204</sup>         | Cell Signaling | 9101S     | 42, 44     | Rabbit | 1:1000   |
| JNK                                    | Cell Signaling | 9252S     | 46, 54     | Rabbit | 1:1000   |
| p-JNK <sup>Thr183/Tyr185</sup>         | Cell Signaling | 9255S     | 46, 54     | Mouse  | 1:1000   |
| p38                                    | Cell Signaling | 9212S     | 38         | Rabbit | 1:1000   |
| phospho-p38 <sup>Thr180/Tyr182</sup>   | Cell Signaling | 9215S     | 38         | Rabbit | 1:1000   |
| Mouse IgG                              | Cell Signaling | 7076S     |            | Horse  | 1:2000   |
| Rabbit IgG                             | Cell Signaling | 7074S     |            | Goat   | 1:2000   |

p, phospho
