# Supplementary material for: Anti-Inflammatory Effects of Clematis terniflora Leaf on Lipopolysaccharide-Induced Acute Lung Injury
Source: Evid Based Complement Alternat Med. 2024 Jan 9;2024:6653893. doi: 10.1155/2024/6653893 (PMC10791263; doi:10.1155/2024/6653893)
Supplement: Supplementary Materials — Supplementary material consists of the additional data and the detailed information of primer sequences and antibodies. Supplementary Figure S1: effects of EELCT on cell viability. Supplementary Figure S2: effect of EELCT on MPO production in LPS-induced ALI model. Supplementary Table S1: primer sequences used for qPCR. Supplementary Table S2: antibody information used in Western blot. [file 6653893.f1.zip]

Archive with 4 entries (4 files):
- Supplementary material-revised.pdf
- Table 1.docx
- Table 2.docx
- Supplementary material-revised.docx
